# Supplementary material for: Screening for Methane Utilizing Mixed Communities with High Polyhydroxybutyrate (PHB) Production Capacity Using Different Design Approaches
Source: Polymers (Basel). 2021 May 14;13(10):1579. doi: 10.3390/polym13101579 (PMC8157138; doi:10.3390/polym13101579)
Supplement: Supplementary file 1 [file polymers-13-01579-s001.zip › polymers-1142946-supplementary.pdf]

Supplementary Information

# Screening for Methane Utilizing Mixed Communities with High Polyhydroxybutyrate (PHB) Production Capacity Using Different Design Approaches

Rana Salem <sup>1</sup>, Moomen Soliman <sup>2</sup>, Ahmed Fergala <sup>3</sup>, Gerald F. Audette <sup>4</sup> and Ahmed ElDyasti <sup>5,\*</sup>

<sup>1</sup> Civil Engineering Department, York University, 4700 Keele street, Toronto, M3J 1P3, ON, Canada; rsa-lem@yorku.ca

<sup>2</sup> Civil Engineering Department, York University, 4700 Keele street, Toronto, M3J 1P3, ON, Canada; [ilasimbf@yorku.ca](mailto:ilasimbf@yorku.ca)

<sup>3</sup> Department of Biotechnology, Delft University of Technology, Mekelweg 5, 2628 CD Delft, Netherlands; [a.m.a.fergala@tudelft.nl](mailto:a.m.a.fergala@tudelft.nl)

<sup>4</sup> Chemistry Department, York University, 4700 Keele street, Toronto, M3J 1P3, ON, Canada; audette@yorku.ca

<sup>5</sup> Civil Engineering Department, York University, 4700 Keele street, Toronto, M3J 1P3, ON, Canada; [ahmed.eldyasti@lassonde.yorku.ca](mailto:ahmed.eldyasti@lassonde.yorku.ca)

\* Correspondence: [ahmed.eldyasti@lassonde.yorku.ca](mailto:ahmed.eldyasti@lassonde.yorku.ca)

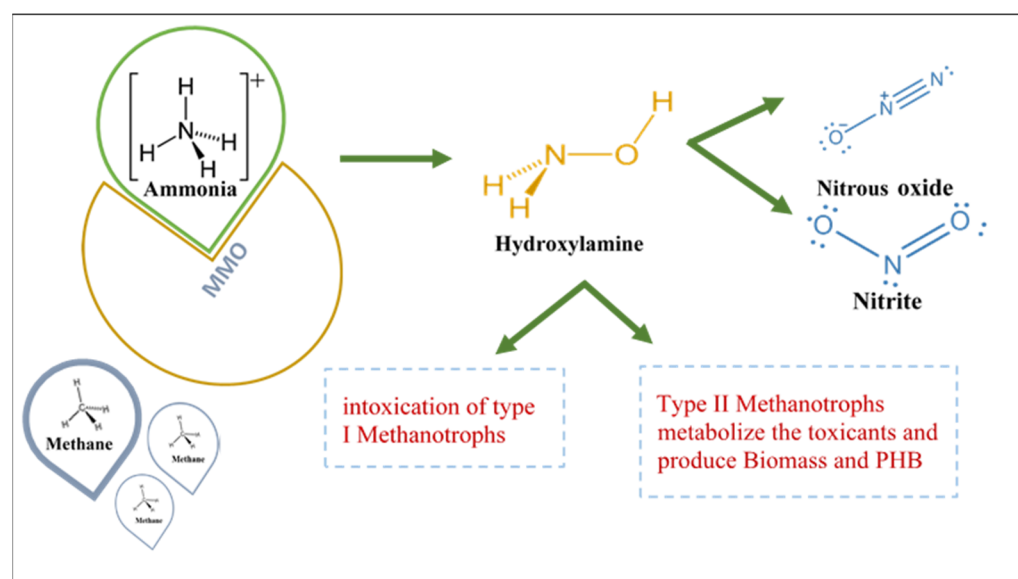

**Figure S1:** An illustration of the competitive inhibition between ammonia and methane

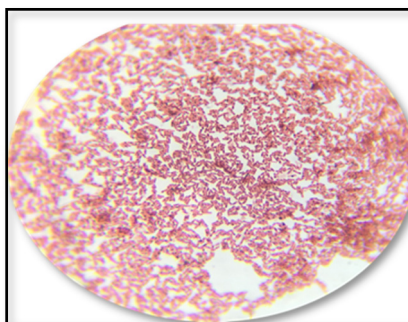

**Figure S2:** PHB granules observed under confocal microscope using Sudan Black B dye.
